# Supplementary material for: Functional abnormalities in the cerebello-thalamic pathways in a mouse model of DYT25 dystonia
Source: eLife. 2022 Jun 14;11:e79135. doi: 10.7554/eLife.79135 (PMC9197392; doi:10.7554/eLife.79135)
Supplement: Supplementary file 1. [file elife-79135-supp1.xlsx]

## Sheet: Supplementary File 1a
Supplementary File 1a: Figure1
Experiment	Kruskal	p-value	Condition 1	Condition 2	p-value	sig
Vertical Pole	1.7689	0.6217
Horizontal Bar	14.4145	0.002	WT M	GNAL F	0.0892	n.s.
			WT M	GNAL M	0.941	n.s.
			WT M	WT F	0.0196	*
			WT F	GNAL F	0.7749	n.s.
			WT F	GNAL M	0.0137	*
			GNAL M	GNAL F	0.084	n.s.
FSR 5rpm	2.454	0.483
FSR 10rpm	7.124	0.068
FSR 15rpm	5.321	0.1496
FSR 20rpm	2.168	0.538
FSR 25rpm	1.663	0.644
Grid Test	4.0266	0.2586
Gait width	3.8052	0.2832
Alternation coef	0.9682	0.8089
Linear movement	0.6945	0.8744
Length	5.1623	0.1602
Sigma	1.0476	0.7897
Thigmotaxis	1.4195	0.7009
Time center	0.7694	0.8567
Median speed	3.155	0.368
Distance travelled	2.1838	0.5351

## Sheet: Supplementary File 1b
Supplementary File 1b: Number of mice and neurons
	DN stim: Baseline				DN stim: Theta Burst
region	# cells		# mice		# cells		# mice
	WT	GNAL +/-	WT	GNAL +/-	WT	GNAL +/-	WT	GNAL +/-
VAL	56	51	4	5	29	24	3	5
CL	28	47	4	5	6	34	3	5
M1	31	41	6	6	34	48	5	6
DN					20	30	5	5
DLS Slow spiking					5	25	2	4
DLS Fast spiking					21	16	4	4

## Sheet: Supplementary File 1c
Supplementary File 1c: Figure 2 C
Effect	Condition	VAL	CL	M1
Exposition Oxo	WT	F(2,138)=2.9283 p=0.05682	F(2,59)=3.57 p=0.03439*	F(2,93)=22.4298 p<0.001***
	GNAL +/-	F(2,123)=199.075 p<0.001***	F(2,125)=35.7956 p<0.001***	F(2,127)=88.3524 p<0.001***
	Genotype ≠	F(2,261)=58.7607 p<0.001&&&	F(2,184)=16.1783 p<0.001&&&	F(2,220)=71.7838 p<0.001&&&

## Sheet: Supplementary File 1d
Supplementary File 1d: Figure 2 C
Structure	Genotype	Condition 1	Condition 2	p-value	sig
VAL	WT	Naive	Oxo	0.944672	n.s.
		Naive	Exposed	0.02215	*
		Oxo	Exposed	0.02215	*
	GNAL	Naive	Oxo	0.773794	n.s.
		Naive	Exposed	<0.001	***
		Oxo	Exposed	<0.001	***
CL	WT	Naive	Oxo	0.490435	n.s.
		Naive	Exposed	0.490435	n.s.
		Oxo	Exposed	0.299397	n.s.
	GNAL	Naive	Oxo	0.38718	n.s.
		Naive	Exposed	0.001478	**
		Oxo	Exposed	0.014147	*
M1	WT	Naive	Oxo	0.214952	n.s.
		Naive	Exposed	0.093273	n.s.
		Oxo	Exposed	0.003486	**
	GNAL	Naive	Oxo	0.2481	n.s.
		Naive	Exposed	<0.001	***
		Oxo	Exposed	0.003526	**

## Sheet: Supplementary File 1e
Supplementary File 1e: Figure 3 DE
Treatment	Condition	VAL	CL	M1
Saline + θ-burst	WT (Wilcoxon)	p<0.001*** cd=-0.42466	p=0.062 cd=-1.18743	p=0.02* cd=-0.45191
Cerebellar stim	GNAL +/- (Wilcoxon)	p=0.921 cd=0.0102	p=0.153 cd=-0.14241	p=0.075 cd=0.13435
	Genotype ≠ (MannWhitney)	p=0.027# hg=0.66568	p=0.006## hg=1.19251	p<0.001### hg=0.5813
Saline + θ-burst	WT (Wilcoxon)	p=0.041* cd=-0.22337	p=0.156 cd=-0.79691	p=0.021* cd=-0.14197
Afferent volley	GNAL +/- (Wilcoxon)	p=0.344 cd=0.09419	p=0.441 cd=0.14965	p=0.648 cd=0.04335
	Genotype ≠ (MannWhitney)	p=0.022# hg=0.44896	p=0.0135# hg=0.70496	p=0.098 hg=0.33257
Effect size: Cohen' s D (cd) and Hedge's G (hg)

## Sheet: Supplementary File 1f
Supplementary File 1f: Figure 4 BE
Treatment	Condition	DN	DLS Slow spiking	DLS Fast spiking
DN-CL Stim Sal	WT (Wilcoxon)	p<0.001***	p=0.312	p=0.473
	GNAL +/- (Wilcoxon)	p=0.001**	p=0.312	p=0.143
	Genotype ≠ (MannWhitney)	p=0.464	p=0.186	p=0.362

## Sheet: Supplementary File 1g
Supplementary File 1g: Figure 4 CHI
Treatment	Condition	DN	DLS Slow spiking	DLS Fast spiking
Saline + θ-burst	WT (Wilcoxon)	p=0.368 cd=-0.11949	p=0.312 cd=0.04706	p=0.038* cd=-0.13267
Cerebellar stim	GNAL +/- (Wilcoxon)	p=0.177 cd=0.04355	p=0.832 cd=-0.01732	p=0.463 cd=0.02978
	Genotype ≠ (MannWhitney)	p=0.060 hg=0.40709	p=0.411 hg=-0.17826	p=0.026# hg=0.42024
Saline + θ-burst	WT (Wilcoxon)	p=0.647 cd=0.01482	p=0.312 cd=0.2537	p=0.029* cd=-0.31629
Afferent volley	GNAL +/- (Wilcoxon)	p=0.781 cd=0.01313	p=0.366 cd=-0.29715	p=0.743 cd=-0.04621
	Genotype ≠ (MannWhitney)	p=0.33 hg=-0.02358	p=0.042# hg=-0.76229	p=0.159 hg=0.41906

## Sheet: Supplementary File 1h
Supplementary File 1h: Figure 5 B
Effect	Condition	VAL	CL	M1
DN Stim Saline	Genotype ≠ (MannWhitney)	p=0.012#	p=0.033#	p<0.001###

## Sheet: Supplementary File 1i
Supplementary File 1i: Figure 5 EG
Treatment	Condition	VAL	CL	M1
Oxo + θ-burst	WT (Wilcoxon)	p=0.294 cd=0.11958	p=0.0625 cd=-0.88553	p=0.426 cd=-0.44168
Cerebellar stim	GNAL +/- (Wilcoxon)	p<0.001*** cd=0.23379	p=0.002** cd=0.26397	p<0.001*** cd=0.24285
	Genotype ≠ (MannWhitney)	p=0.019# hg=0.45713	p<0.001### hg=2.14767	p<0.001### hg=0.84924
Oxo + θ-burst	WT (Wilcoxon)	p=0.837 cd=-0.23158	p=0.4357 cd=0.66083	p=0.285 cd=-0.09568
Afferent volley	GNAL +/- (Wilcoxon)	p<0.001*** cd=0.6522	p=0.01* cd=0.30942	p<0.001*** cd=0.21646
	Genotype ≠ (MannWhitney)	p<0.004## hg=0.88508	p=0.417 hg=0.07363	p<0.001### hg=0.58883

## Sheet: Supplementary File 1j
Supplementary File 1j: Figure 5 IJ
Parameter	Treatment	Genotype	Comparaison	Test	p-value	sig
Abnormal Motor score	Oxo	WT	pre θ - post θ	Wilcoxon	0.577	n.s.
		GNAL	pre θ - post θ	Wilcoxon	0.0253	*
Active wake	Saline	WT	pre θ - post θ	Wilcoxon	0.413	n.s.
		GNAL	pre θ - post θ	Wilcoxon	0.295	n.s.
	Oxo	WT	pre θ - post θ	Wilcoxon	0.278	n.s.
		GNAL	pre θ - post θ	Wilcoxon	0.016	*

[truncated: 8 more sheets: Supplementary File 1k, Supplementary File 1l, Supplementary File 1m, Supplementary File 1n, Supplementary File 1o, Supplementary File 1p, Supplementary File 1q, Supplementary File 1r]
